# Supplementary material for: Pineoblastoma: prognostic factors and survival outcomes in young children
Source: PubMed Central journal article supplement — Chin Med J (Engl). 2023 Jan 10;136(3):367–9. doi: 10.1097/CM9.0000000000002063 (PMC10106190; doi:10.1097/cm9.0000000000002063), 2023-01-10
Supplement: cm9-136-367-s001.pdf [file cm9-136-367-s001.pdf]

## Supplementary Materials

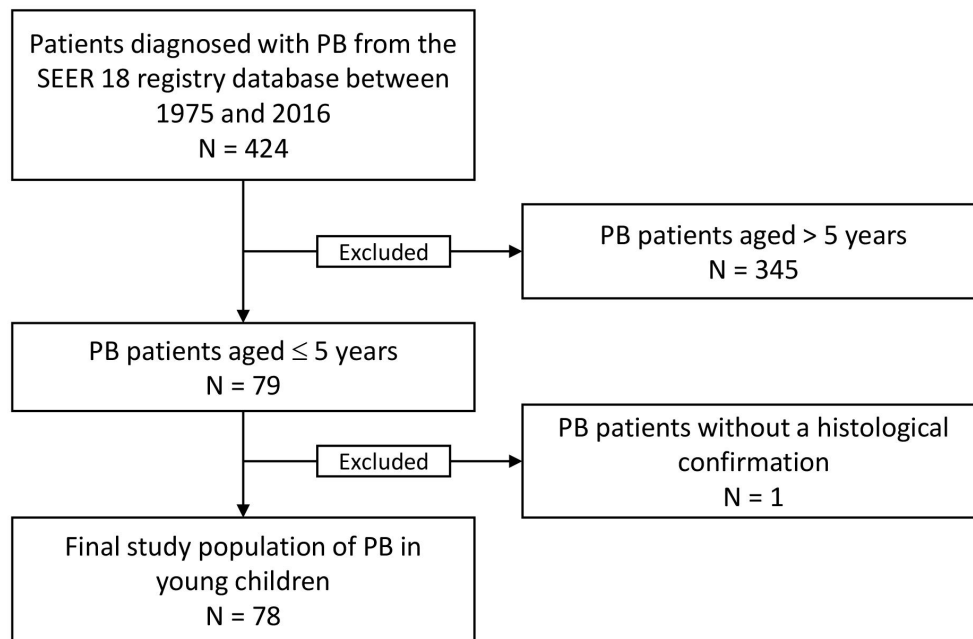

**Supplementary Figure 1:** Flowchart of patient selection.

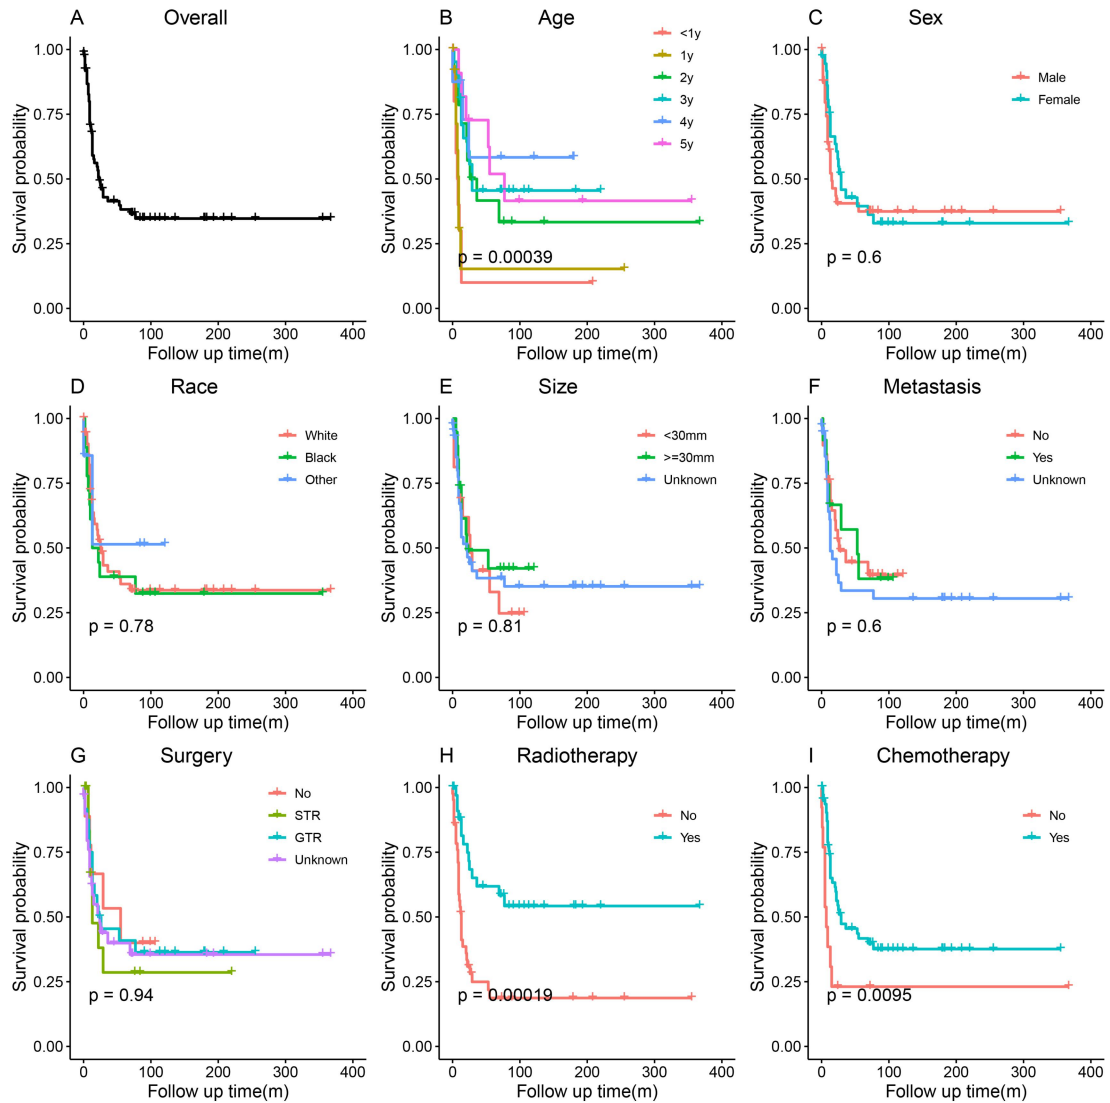

**Supplementary Figure 2:** The Kaplan–Meier curves for PB patients aged  $\leq 5$  years. (A) OS for the whole cohort, (B) OS stratified by age at diagnosis, (C) OS stratified by sex, (D) OS stratified by race, (E) OS stratified by tumor size, (F) OS stratified by metastasis status, (G) OS stratified by surgery procedure, (H) OS stratified by receipt of radiotherapy, (I) OS stratified by receipt of chemotherapy. OS: Overall survival; PB: Pineoblastoma.

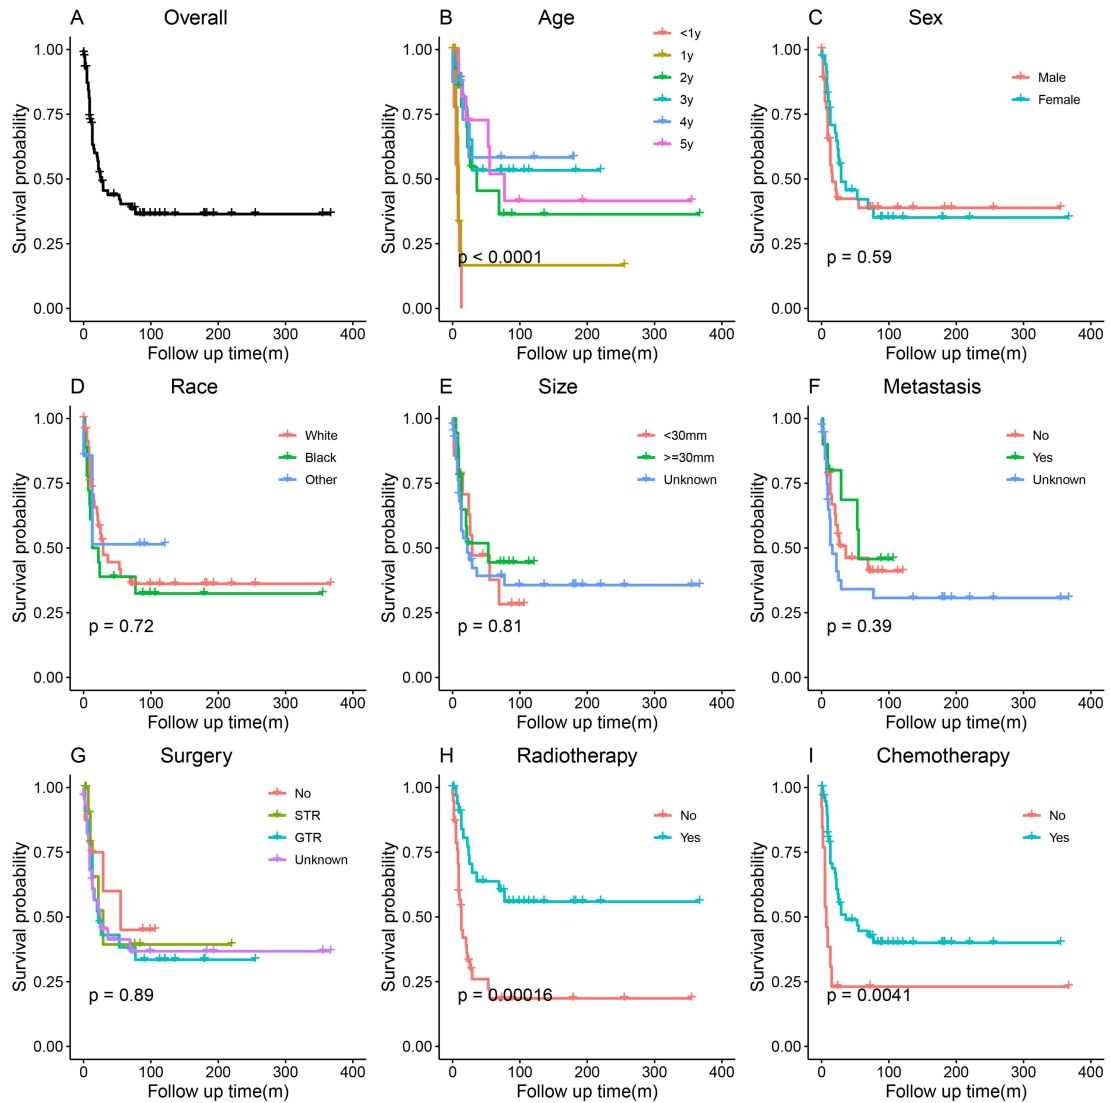

**Supplementary Figure 3:** The Kaplan–Meier curves for PB patients aged  $\leq 5$  years.

(A) DSS for the whole cohort, (B) DSS stratified by age at diagnosis, (C) DSS stratified by sex, (D) DSS stratified by race, (E) DSS stratified by tumor size, (F) DSS stratified by metastasis status, (G) DSS stratified by surgery procedure, (H) DSS stratified by receipt of radiotherapy, (I) DSS stratified by receipt of chemotherapy.

DSS: Disease-specific survival; PB: Pineoblastoma.

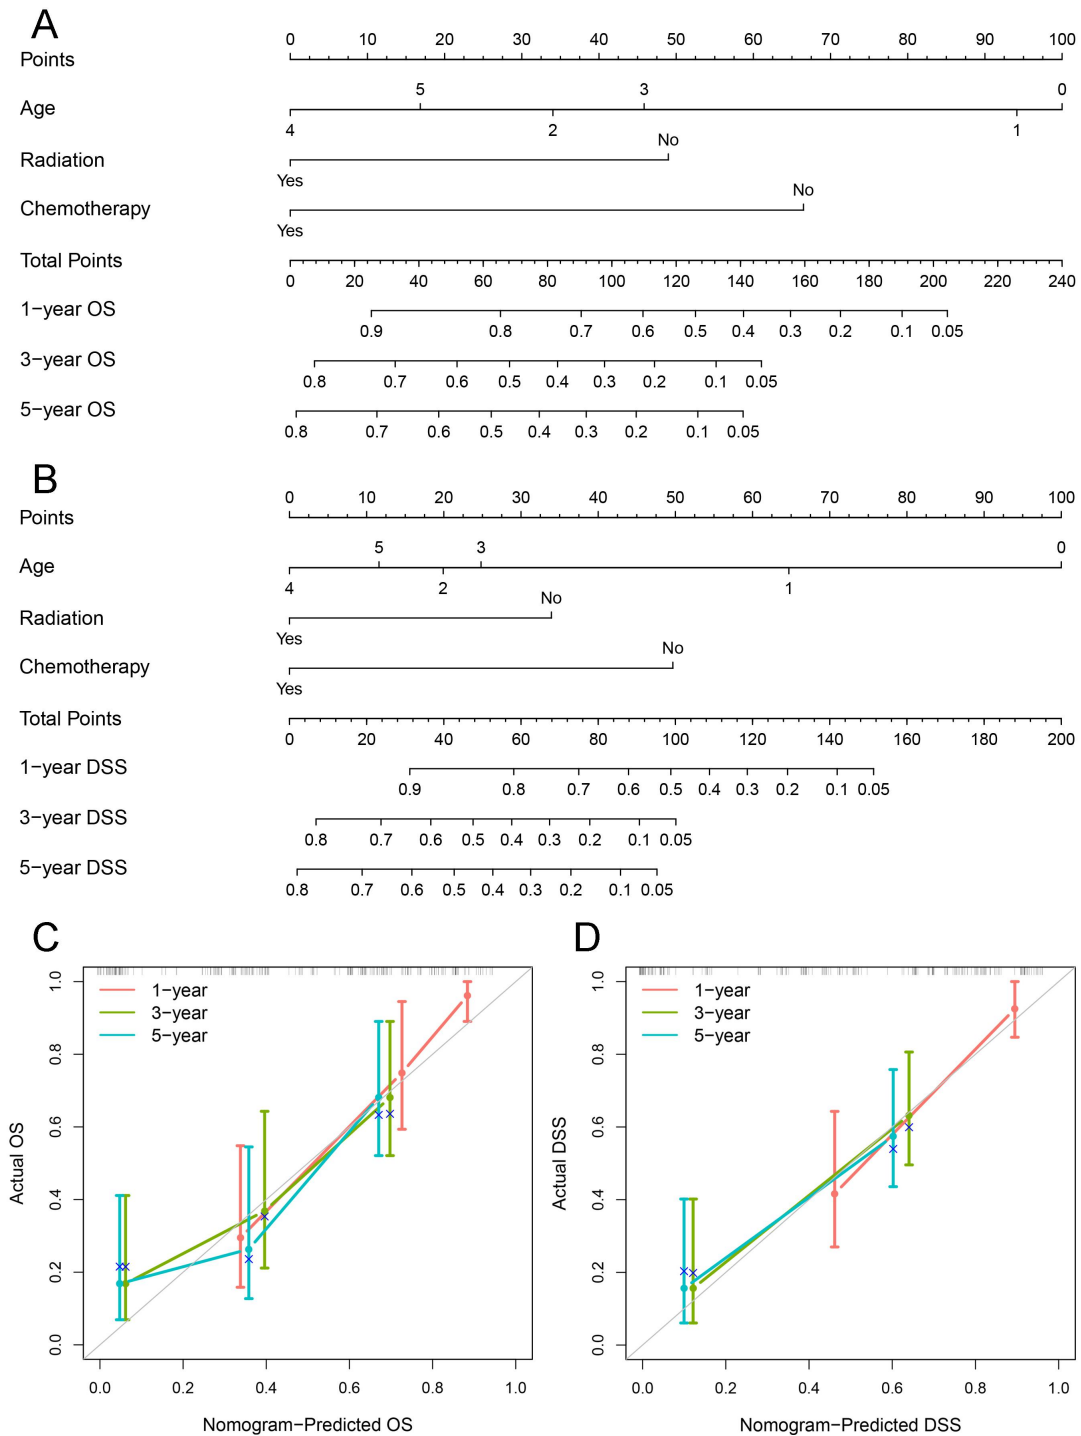

**Supplementary Figure 4:** The developed nomograms to make individualized predictions of 1-year, 3-year, and 5-year (A) OS and (B) DSS. The calibration curves of the nomograms for 1-year, 3-year, and 5-year (C) OS and (D) DSS. DSS: Disease-specific survival; OS: Overall survival.

**Supplementary Table 1: Baseline characteristics of PB patients aged ≤5 years in the SEER 18 Registry database, 1975–2016.**

| <b>Characteristics</b>        | <b>Number of patients</b> | <b>Percentage (%)</b> |
|-------------------------------|---------------------------|-----------------------|
| <b>Total</b>                  | 78                        | 100                   |
| <b>Follow-up time (month)</b> |                           |                       |
| Median (IQR)                  | 18.00 (8.75 - 76.25)      |                       |
| <b>Age (years)</b>            |                           |                       |
| Mean ± SD                     | 2.45 ± 1.584              |                       |
| Median (IQR)                  | 3.00 (1.00 - 3.25)        |                       |
| < 1                           | 11                        | 14.1                  |
| 1                             | 13                        | 16.7                  |
| 2                             | 14                        | 17.9                  |
| 3                             | 21                        | 26.9                  |
| 4                             | 8                         | 10.3                  |
| 5                             | 11                        | 14.1                  |
| <b>Sex</b>                    |                           |                       |
| Male                          | 41                        | 52.6                  |
| Female                        | 37                        | 47.4                  |
| <b>Race</b>                   |                           |                       |
| White                         | 53                        | 67.9                  |
| Black                         | 18                        | 23.1                  |
| Other                         | 7                         | 9.0                   |
| <b>Tumor size</b>             |                           |                       |
| < 30 mm                       | 16                        | 20.5                  |
| ≥ 30 mm                       | 19                        | 24.4                  |
| Unknown                       | 43                        | 55.1                  |
| <b>Metastasis</b>             |                           |                       |
| No                            | 29                        | 37.2                  |
| Yes                           | 12                        | 15.4                  |
| Unknown                       | 37                        | 47.4                  |
| <b>Surgical procedure</b>     |                           |                       |
| No surgery                    | 9                         | 11.5                  |
| STR                           | 14                        | 17.9                  |
| GTR                           | 24                        | 30.8                  |
| Surgery, NOS                  | 31                        | 39.7                  |
| <b>Radiotherapy</b>           |                           |                       |
| No                            | 42                        | 53.8                  |
| Yes                           | 36                        | 46.2                  |
| <b>Chemotherapy</b>           |                           |                       |
| No                            | 13                        | 16.7                  |
| Yes                           | 65                        | 83.3                  |

PB: Pineoblastoma; SEER: Surveillance Epidemiology and End Results; STR: Subtotal resection; GTR: Gross-total resection; NOS: Not otherwise specified.

**Supplementary Table 2: Univariate Cox proportional-hazard models for OS and DSS.**

| Variable                  | Overall survival    |          | Disease-specific survival |          |
|---------------------------|---------------------|----------|---------------------------|----------|
|                           | HR (95% CI)         | <i>P</i> | HR (95% CI)               | <i>P</i> |
| <b>Age (years)</b>        |                     | 0.002    |                           | <0.001   |
| < 1                       | Reference           |          | Reference                 |          |
| 1                         | 0.876 (0.336-2.283) | 0.787    | 0.443 (0.161-1.219)       | 0.115    |
| 2                         | 0.293 (0.115-0.751) | 0.011    | 0.132 (0.047-0.373)       | <0.001   |
| 3                         | 0.238 (0.097-0.585) | 0.002    | 0.092 (0.032-0.263)       | <0.001   |
| 4                         | 0.169 (0.045-0.633) | 0.008    | 0.084 (0.021-0.335)       | <0.001   |
| 5                         | 0.211 (0.074-0.603) | 0.004    | 0.105 (0.034-0.322)       | <0.001   |
| <b>Sex</b>                |                     |          |                           |          |
| Male                      | Reference           |          | Reference                 |          |
| Female                    | 0.860 (0.482-1.535) | 0.610    | 0.846 (0.458-1.564)       | 0.594    |
| <b>Race</b>               |                     | 0.788    |                           | 0.725    |
| White                     | Reference           |          | Reference                 |          |
| Black                     | 1.133 (0.581-2.207) | 0.715    | 1.254 (0.632-2.487)       | 0.518    |
| Other                     | 0.730 (0.223-2.393) | 0.603    | 0.808 (0.244-2.676)       | 0.808    |
| <b>Tumor size</b>         |                     | 0.822    |                           | 0.812    |
| < 30 mm                   | Reference           |          | Reference                 |          |
| ≥ 30 mm                   | 0.768 (0.326-1.811) | 0.547    | 0.825 (0.327-2.080)       | 0.683    |
| Unknown                   | 0.928 (0.456-1.887) | 0.836    | 1.063 (0.491-2.299)       | 0.877    |
| <b>Metastasis</b>         |                     | 0.611    |                           | 0.407    |
| No                        | Reference           |          | Reference                 |          |
| Yes                       | 0.990 (0.406-2.409) | 0.982    | 0.793 (0.287-2.187)       | 0.654    |
| Unknown                   | 1.337 (0.705-2.534) | 0.374    | 1.402 (0.721-2.724)       | 0.319    |
| <b>Surgical procedure</b> |                     | 0.943    |                           | 0.892    |
| No surgery                | Reference           |          | Reference                 |          |
| STR                       | 1.357 (0.443-4.157) | 0.593    | 1.116 (0.299-4.167)       | 0.870    |
| GTR                       | 1.127 (0.409-3.103) | 0.818    | 1.428 (0.473-4.308)       | 0.527    |
| Surgery, NOS              | 1.259 (0.467-3.395) | 0.649    | 1.414 (0.475-4.209)       | 0.533    |
| <b>Radiotherapy</b>       |                     |          |                           |          |
| No                        | Reference           |          | Reference                 |          |
| Yes                       | 0.321 (0.170-0.608) | <0.001   | 0.301 (0.154-0.587)       | <0.001   |
| <b>Chemotherapy</b>       |                     | 1        |                           |          |
| No                        | Reference           |          | Reference                 |          |
| Yes                       | 0.412 (0.203-0.835) | 0.014    | 0.369 (0.180-0.758)       | 0.007    |

HR, hazard ratio; CI, confidence interval; STR, subtotal resection; GTR, gross-total resection; NOS, not otherwise specified; DSS: Disease-specific survival; OS: Overall survival.
